# Supplementary material for: Controllable synthesis of WO3·nH2O microcrystals with various morphologies by a facile inorganic route and their photocatalytic activities
Source: Royal Society of Chemistry journal article supplement (doi:10.1039/c3nj41159a), 2013-01-01
Supplement: c3nj41159a.pdf [file c3nj41159a.pdf]

Electronic Supplementary Information (ESI)

# Controllable Synthesis of $\text{WO}_3 \cdot n\text{H}_2\text{O}$ Microcrystals with Various Morphologies by a facile inorganic route and their Photocatalytic Activities

Jichao Shi, Gujin Hu\*, Rui Cong, Haijun Bu, Ning Dai\*

National Laboratory for Infrared Physics, Shanghai Institute of Technical Physics, Chinese Academy of Sciences, Shanghai, 200083, PR China

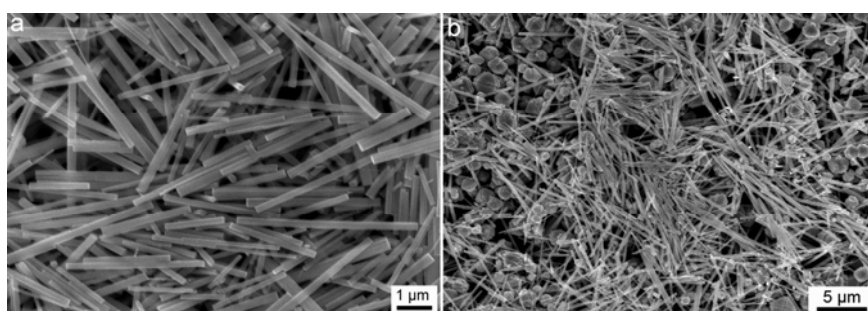

Fig. S1 SEM images of the samples obtained by the hydrothermal method at different additive amount of  $\text{Na}_2\text{SO}_4$ : (a) 0.1 g  $\text{Na}_2\text{SO}_4$ , (b) 1.5 g  $\text{Na}_2\text{SO}_4$ .

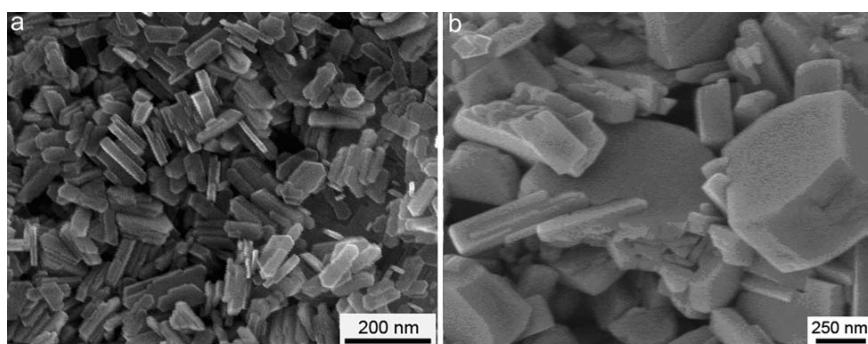

Fig. S2 SEM images of the N1 obtained by the hydrothermal method at different reaction conditions

\*Correspondence Authors: Tel: +86-21-25051415

E-mail Address: [hugj@mail.sitp.ac.cn](mailto:hugj@mail.sitp.ac.cn); [ndai@mail.sitp.ac.cn](mailto:ndai@mail.sitp.ac.cn)

(a) in 100 °C for 24 h, (b) 200 °C for 12 h.

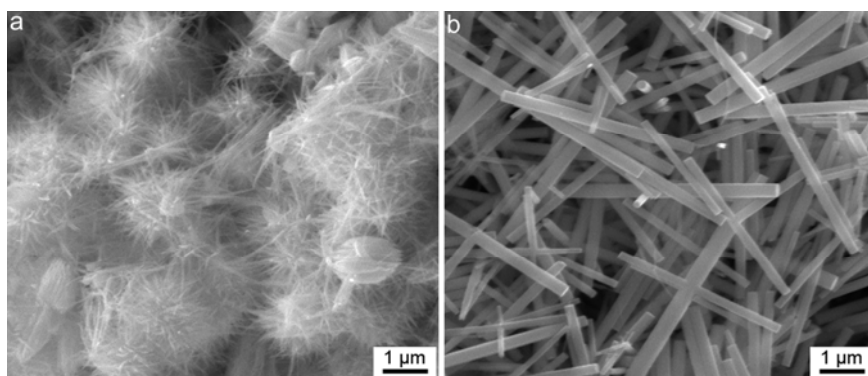

Fig. S3 SEM images of the N2 obtained by the hydrothermal method at different reaction temperatures for 6 h: (a) 150 °C, (b) 200 °C and when the T is 100 °C, no any precipitate was obtained.

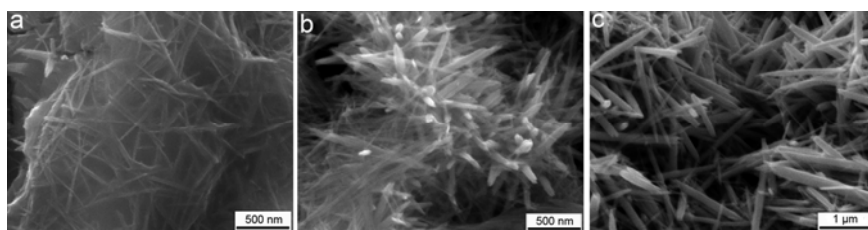

Fig.S4 SEM images of the N2 obtained by the hydrothermal method at 200 °C for different time: (a) 1.5 h, (b) 2.5 h, and (c) 3.5 h.

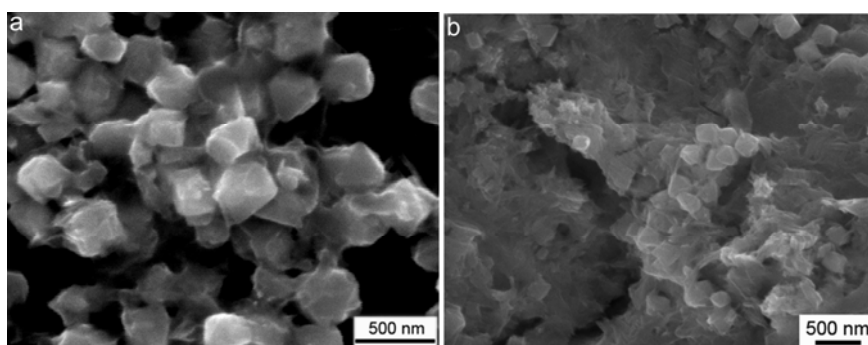

Fig. S5 SEM images of the N3 formed by the hydrothermal method at different reaction temperatures for 6 h: (a) 100 °C, and (c) 150 °C.

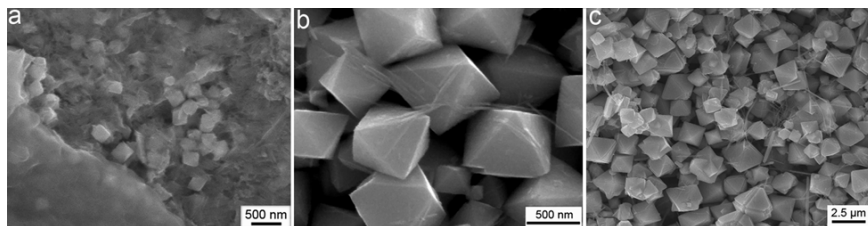

Fig. S6 SEM images of the N3 prepared by the hydrothermal method at 200 °C for different time: (a) 1.5 h, (b) 2.5 h, and (c) 3.5 h.
